# Supplementary material for: Luminescent osmium(ii) bi-1,2,3-triazol-4-yl complexes: photophysical characterisation and application in light-emitting electrochemical cells
Source: Royal Society of Chemistry journal article supplement (doi:10.1039/c6dt00830e), 2016-01-01
Supplement: c6dt00830e1.pdf [file c6dt00830e1.pdf]

Supporting Information for  
Luminescent osmium(II) bi-1,2,3-triazol-4-yl complexes:  
photophysical characterisation and application in light-  
emitting electrochemical cells

Daniel A. W. Ross,<sup>a</sup> Paul A. Scattergood,<sup>a</sup> Azin Babaei,<sup>b</sup> Antonio Pertegás,<sup>b</sup> Henk J. Bolink<sup>b\*</sup>

and Paul I.P. Elliott<sup>a\*</sup>

<sup>a</sup>*Department of Chemistry, University of Huddersfield, Queensgate, Huddersfield, HD1 3DH, UK.*

<sup>b</sup>*Instituto de Ciencia Molecular (ICMol), Universidad de Valencia, C/Catedrático José Beltrán, 2, 46980 Paterna, Spain.*

|                    |                                                                                                                            |            |
|--------------------|----------------------------------------------------------------------------------------------------------------------------|------------|
| <b>Figure S1:</b>  | UV-Visible electronic absorption spectra for CH <sub>2</sub> Cl <sub>2</sub> solutions of <b>1-4</b>                       | <b>S3</b>  |
| <b>Figure S2:</b>  | Room temperature aerated emission spectra for CH <sub>2</sub> Cl <sub>2</sub> solutions of <b>1-3</b>                      | <b>S3</b>  |
| <b>Table S1:</b>   | Summarised photophysical data for CH <sub>2</sub> Cl <sub>2</sub> solutions of <b>1-4</b>                                  | <b>S4</b>  |
| <b>Figure S3:</b>  | Room temperature emission spectrum recorded for [Os(btz) <sub>3</sub> ][PF <sub>6</sub> ] <sub>2</sub> (Complex <b>4</b> ) | <b>S4</b>  |
| <b>Figure S4:</b>  | <sup>1</sup> H NMR for [Os(η <sup>6</sup> -C <sub>6</sub> H <sub>6</sub> )(bpy)Cl][PF <sub>6</sub> ]                       | <b>S5</b>  |
| <b>Figure S5:</b>  | <sup>13</sup> C NMR for [Os(η <sup>6</sup> -C <sub>6</sub> H <sub>6</sub> )(bpy)Cl][PF <sub>6</sub> ]                      | <b>S6</b>  |
| <b>Figure S6:</b>  | <sup>1</sup> H NMR for [Os(η <sup>6</sup> -C <sub>6</sub> H <sub>6</sub> )(btz)Cl][PF <sub>6</sub> ]                       | <b>S7</b>  |
| <b>Figure S7:</b>  | <sup>13</sup> C NMR for [Os(η <sup>6</sup> -C <sub>6</sub> H <sub>6</sub> )(btz)Cl][PF <sub>6</sub> ]                      | <b>S8</b>  |
| <b>Figure S8:</b>  | <sup>1</sup> H NMR for [Os(bpy) <sub>3</sub> ][PF <sub>6</sub> ] <sub>2</sub> (Complex <b>1</b> )                          | <b>S9</b>  |
| <b>Figure S9:</b>  | <sup>13</sup> C NMR for [Os(bpy) <sub>3</sub> ][PF <sub>6</sub> ] <sub>2</sub> (Complex <b>1</b> )                         | <b>S10</b> |
| <b>Figure S10:</b> | <sup>1</sup> H NMR for [Os(bpy) <sub>2</sub> (btz)][PF <sub>6</sub> ] <sub>2</sub> (Complex <b>2</b> )                     | <b>S11</b> |
| <b>Figure S11:</b> | <sup>13</sup> C NMR for [Os(bpy) <sub>2</sub> (btz)][PF <sub>6</sub> ] <sub>2</sub> (Complex <b>2</b> )                    | <b>S12</b> |
| <b>Figure S12:</b> | <sup>1</sup> H NMR for [Os(bpy)(btz) <sub>2</sub> ][PF <sub>6</sub> ] <sub>2</sub> (Complex <b>3</b> )                     | <b>S13</b> |
| <b>Figure S13:</b> | <sup>13</sup> C NMR for [Os(bpy)(btz) <sub>2</sub> ][PF <sub>6</sub> ] <sub>2</sub> (Complex <b>3</b> )                    | <b>S14</b> |

|                                                                                                   |            |
|---------------------------------------------------------------------------------------------------|------------|
| <b>Figure S14:</b> $^1\text{H}$ NMR for $[\text{Os}(\text{btz})_3][\text{PF}_6]_2$ (Complex 4)    | <b>S15</b> |
| <b>Figure S15:</b> $^{13}\text{C}$ NMR for $[\text{Os}(\text{btz})_3][\text{PF}_6]_2$ (Complex 4) | <b>S16</b> |
| Optimised ground state geometry for complex 1                                                     | <b>S17</b> |
| Optimised ground state geometry for complex 2                                                     | <b>S18</b> |
| Optimised ground state geometry for complex 3                                                     | <b>S19</b> |
| Optimised ground state geometry for complex 4                                                     | <b>S20</b> |
| <b>Table S2:</b> Summary of TDDFT vertical excitation data for complexes 1 to 4                   | <b>S22</b> |
| <b>Figure S16:</b> TDDFT spectra for complexes 1 to 4                                             | <b>S23</b> |

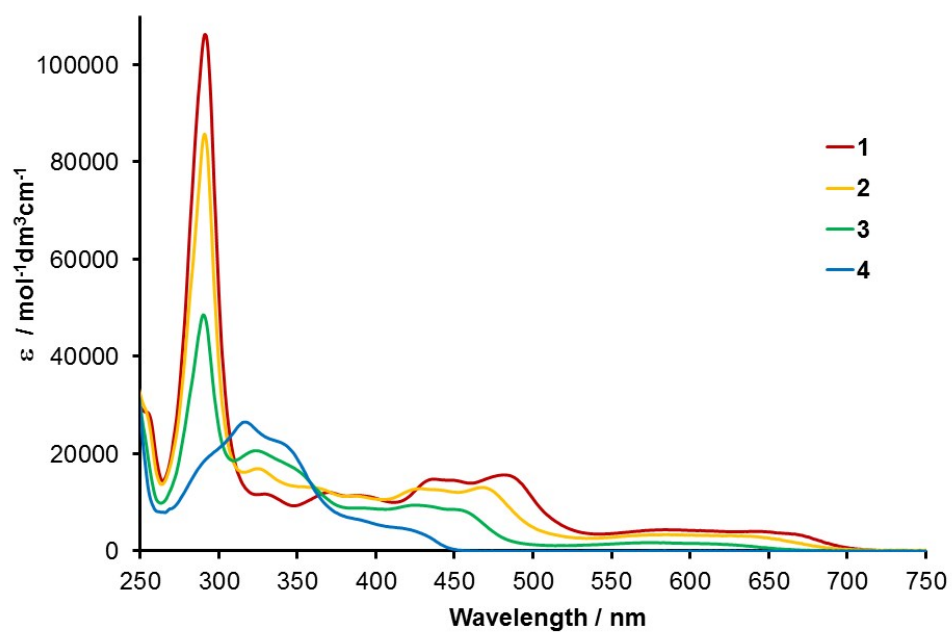

**Figure S1:** UV-Visible electronic absorption spectra for  $\text{CH}_2\text{Cl}_2$  solutions of complexes **1-4**.

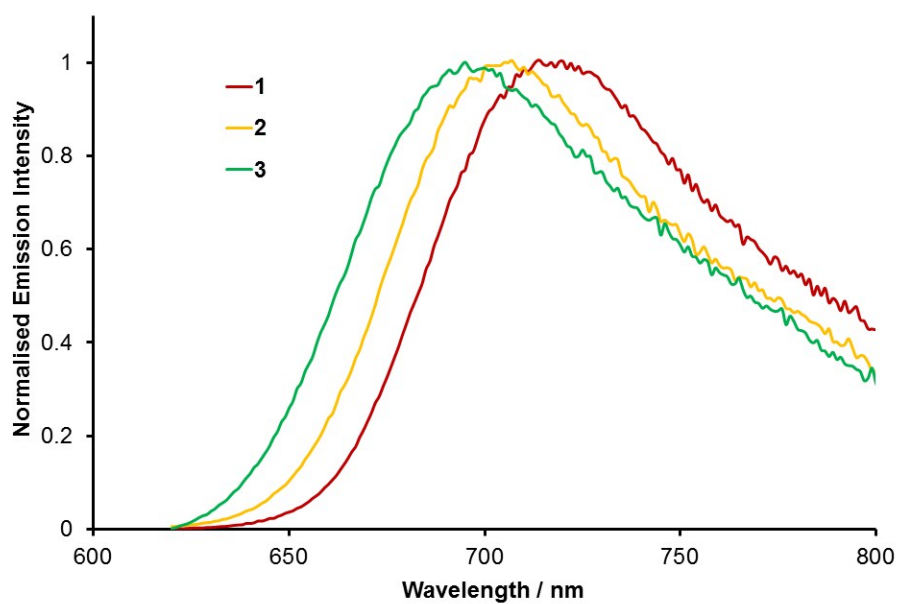

**Figure S2:** Normalised emission spectra recorded for aerated  $\text{CH}_2\text{Cl}_2$  solutions of complexes **1-3** at room temperature.

**Table S1:** Summarised photophysical data for room temperature CH<sub>2</sub>Cl<sub>2</sub> solutions of 1-4.

| Complex | $\lambda_{\text{(abs)}}$ /<br>nm                  | $\lambda_{\text{(em)}}$ /<br>nm <sup>a</sup> | $\tau_{\text{(aerated)}}$ /<br>ns | $\tau_{\text{(degassed)}}$ /<br>ns | $\Phi_{\text{(aerated)}}$ /<br>% <sup>b</sup> | $\Phi_{\text{(degassed)}}$ /<br>% <sup>b</sup> |
|---------|---------------------------------------------------|----------------------------------------------|-----------------------------------|------------------------------------|-----------------------------------------------|------------------------------------------------|
| 1       | 648, 585, 480, 449,<br>437, 390, 369, 329,<br>291 | 717                                          | 73                                | 90                                 | 1.1                                           | 1.4                                            |
| 2       | 634, 578, 467, 438,<br>427, 387, 359, 325,<br>291 | 705                                          | 95                                | 131                                | 1.5                                           | 2.0                                            |
| 3       | 613, 568, 450, 425,<br>392, 324, 290              | 697                                          | 123                               | 175                                | 1.9                                           | 2.8                                            |
| 4       | 418, 388, 338,<br>316, 292                        | -                                            | -                                 | -                                  | -                                             | -                                              |

<sup>a</sup>  $\lambda^{\text{ex}} = 600$  nm; <sup>b</sup> Relative to [Ru(bpy)<sub>3</sub>][PF<sub>6</sub>]<sub>2</sub>  $\Phi_{\text{em}} = 0.018$  in aerated MeCN

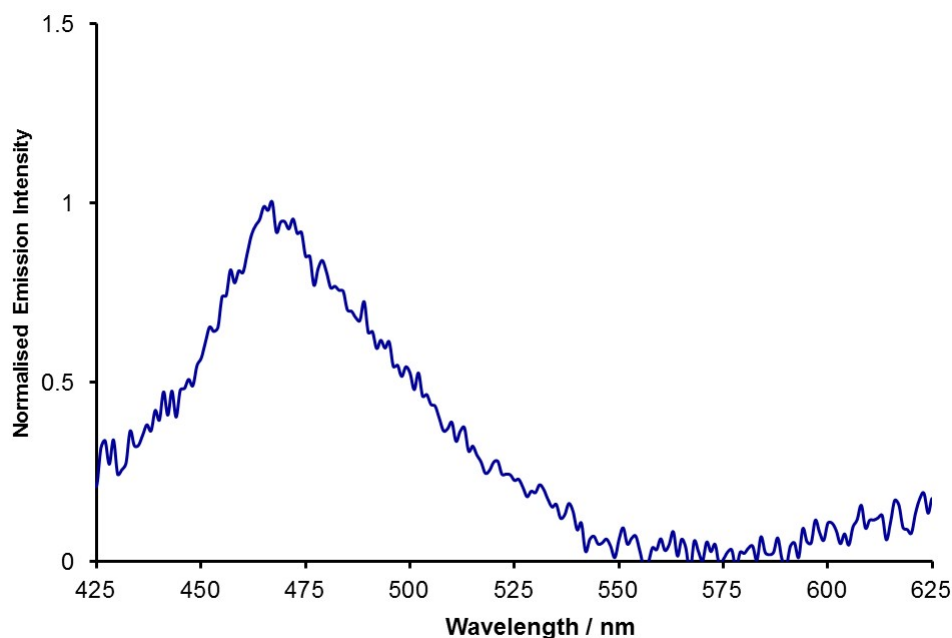**Figure S3:** Normalised emission spectrum recorded for [Os(btz)<sub>3</sub>][PF<sub>6</sub>]<sub>2</sub> (**4**) in aerated MeCN at room temperature ( $\lambda^{\text{ex}} = 365$  nm). Weak emission is discernible above the noise level after subtraction of solvent Raman scattering signals.

Current Data Parameters  
 NAME N827  
 EXPNO 10  
 PROCNO 1  
  
 F2 - Acquisition Parameters  
 Date\_ 20150921  
 Time 12:36  
 TIMEORIG 12:36  
 PROGRAM 5 mm PABBO F2/  
 PULPROG zg30  
 TD 65536  
 CD 32768  
 NS 64  
 DS 2  
 SWH 8223.685 Hz  
 FIDRES 3.9835883 Hz  
 AQ 3.9835883 Hz  
 RG 134.04  
 DW 60.800 usec  
 DE 19.69 usec  
 TE 293.15 K  
 D1 1.00000000 sec  
 TD0 4  
  
 CHANNEL f1  
 SFO1 400.1324710 MHz  
 NUC1 1H  
 P1 8.00 usec  
 PL1 24.00000000 W  
  
 F2 - Processing parameters  
 SI 32768  
 SF 400.1300132 MHz  
 WF 1.00000000 Hz  
 SSB 0  
 LB 0  
 GB 0  
 PC 1.50

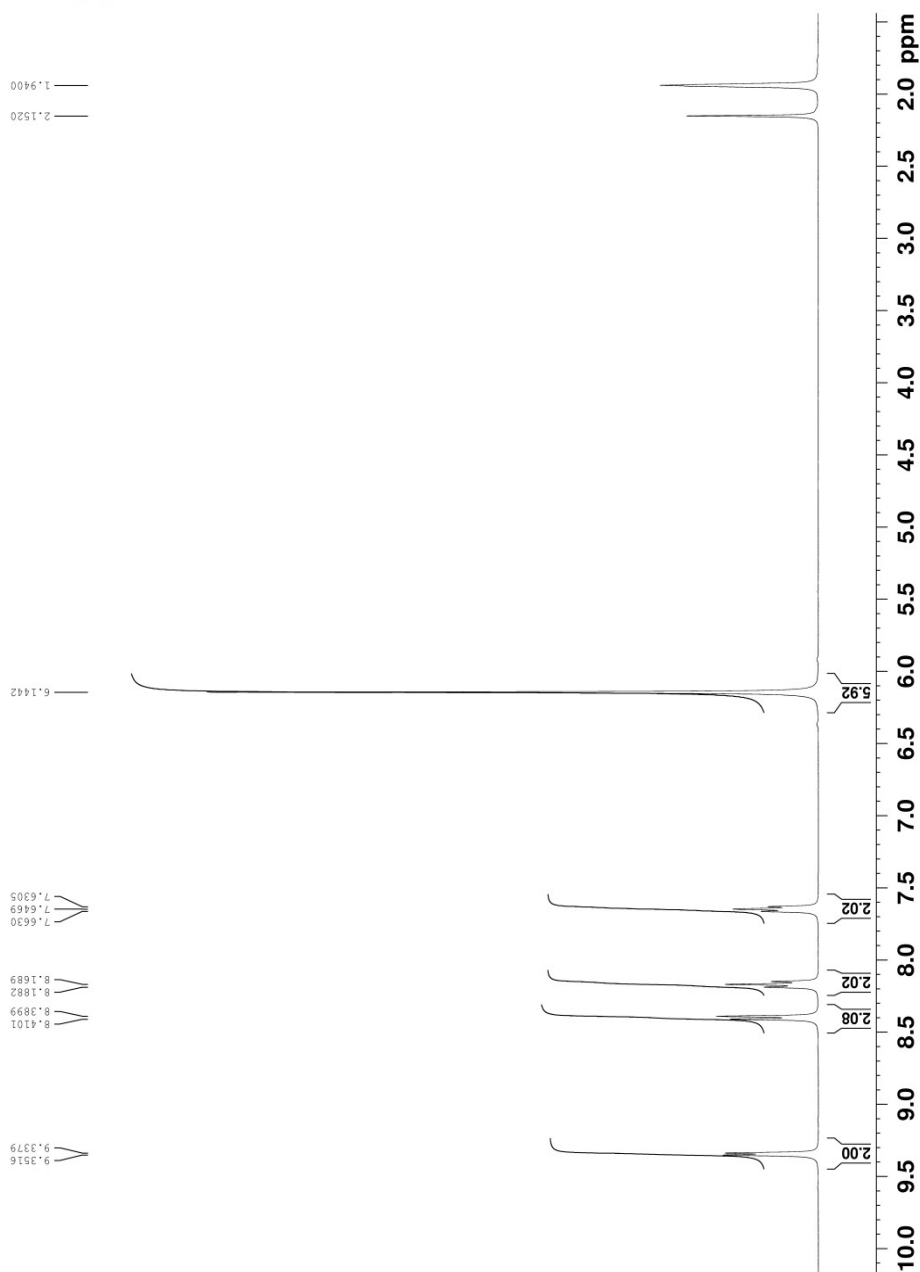

**Figure S4:** <sup>1</sup>H NMR (400 MHz, d<sub>3</sub>-MeCN) of [Os(η<sup>6</sup>-C<sub>6</sub>H<sub>6</sub>)(bpy)Cl][PF<sub>6</sub>]

```

Current Data Parameters
NAME      N6284
EXPNO    10
PROCNO   1

F2 - Acquisition Parameters
Date_    20150921
Time     19.22
INSTRUM  spect
PROBHD   5 mm PABBO
PULPROG  zgpg30
TD       65536
SOLVENT  CD3CN
NS       256
DS       4
SWH      24038.461 Hz
FIDRES   0.366798 Hz
AQ       1.381195 sec
RG       381.72
DW       20.800 usec
DE       8.18 usec
TE       300.2 K
D1       2.00000000 sec
D11      0.03000000 sec
D10      0.03000000 sec
TD0      1

===== CHANNEL f1 =====
SFO1     100.6228284 MHz
NUC1     13C
P1       9.00 usec
PLM1     77.00000000 W

===== CHANNEL f2 =====
SFO2     400.1316005 MHz
NUC2     1H
P2       9.00 usec
PLM2     77.00000000 W
PCPD2    waltz16
PCPD2/2  90.00 usec
PLM2     24.00000000 W
PLM12    0.116229999 W
PLM13    0.116229999 W

F2 - Processing parameters
SI       5556
SF       100.6228284 MHz
WDW      EM
SSB      0
LB       0.50 Hz
GB       0
PC       1.40
    
```

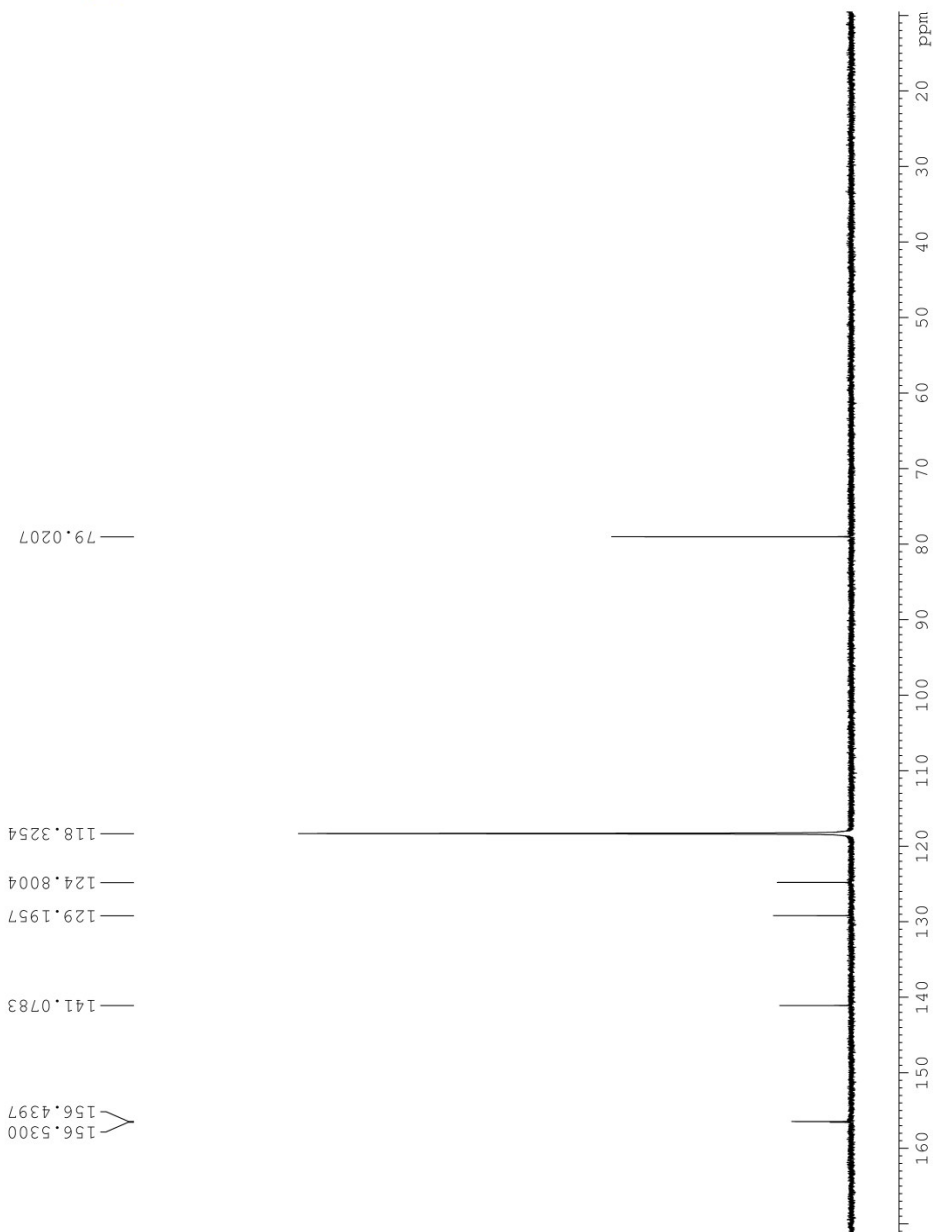

**Figure S5:**  $^{13}\text{C}$  NMR (101 MHz,  $d_3$ -MeCN) of  $[\text{Os}(\eta^6\text{-C}_9\text{H}_9)(\text{bpy})\text{Cl}][\text{PF}_6]$

```

Current Data Parameters
NAME      NS5%
EXPNO    10
PROCNO   1

F2 - Acquisition Parameters
Date_    20151110
Time     12.18
INSTRUM  spect
PROBHD   5 mm PABBO
PULPROG  zg30
TD       65536
SOLVENT  CDCl3
DS       4
SWH      8223.685 Hz
FIDRES   0.125483 Hz
AQ       3.524788 sec
RG       317.88
RO       0.6288888
DE       60.800 usec
TE       10.69 usec
D1       2.0000000 sec
D2       1.0000000 sec
TD0      4

===== CHANNEL f1 =====
NUC1     13C
P1       8.00 usec
PL1      0.0000000 W
===== CHANNEL f2 =====
SI - Processing Parameters
SF       400.1300116 MHz
WDW      EM
SSB      0
LB       0.30 Hz
GB       0
PC       1.50
    
```

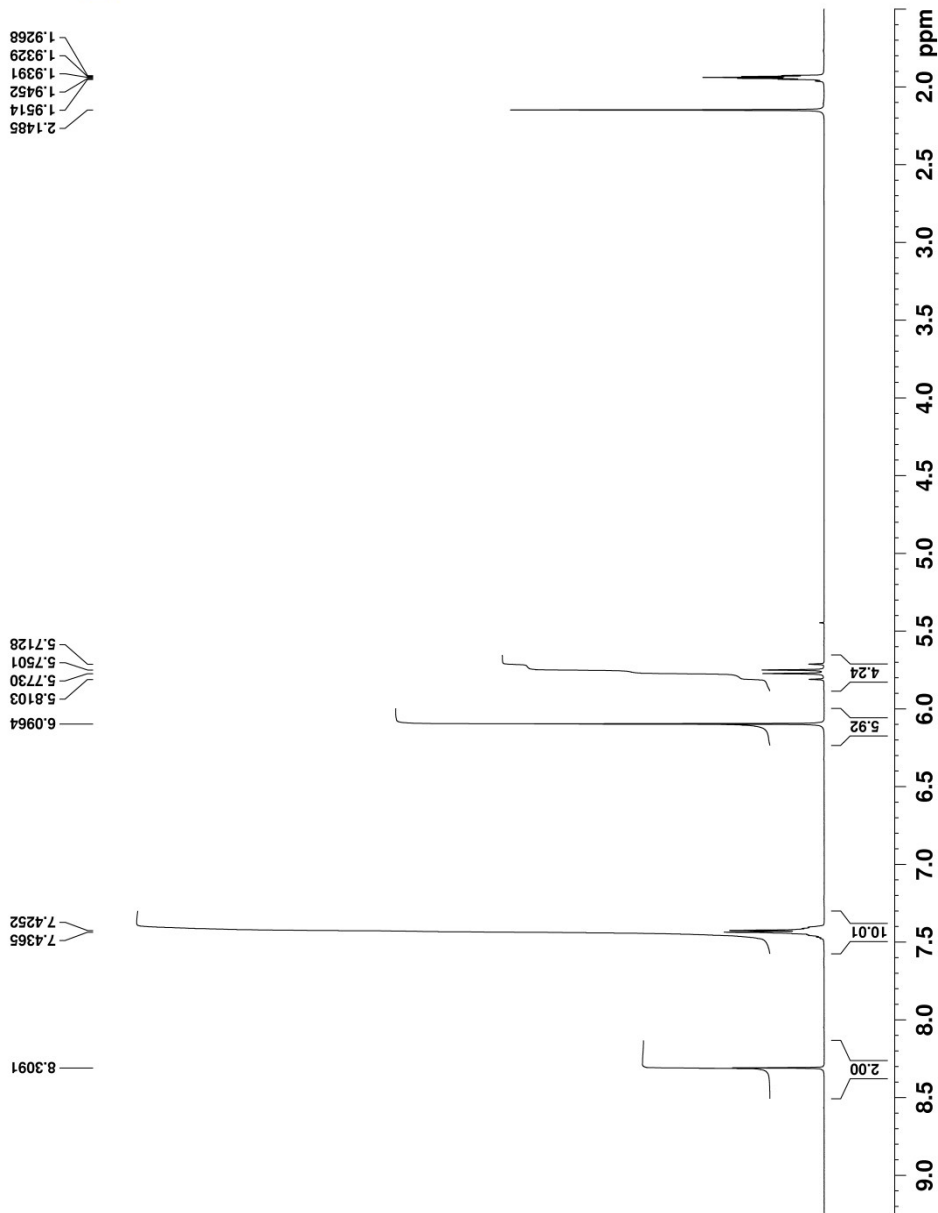

**Figure S6:** <sup>1</sup>H NMR (400 MHz, d<sub>3</sub>-MeCN) of [Os(η<sup>6</sup>-C<sub>6</sub>H<sub>6</sub>)(btz)Cl][PF<sub>6</sub>]

```

Current Data Parameters
NAME      N856+
EXPNO    10
PROCNO   1

F2 - Acquisition Parameters
Date_    20151111
Time     7.55
INSTRUM  spect
PROBHD   5 mm PABBO
PULPROG  zgpg30
TD       65536
SOLVENT  CD3CN
NS       514
DS       4
SWH      24038.461 Hz
FIDRES  0.366798 Hz
AQ       1.381192 sec
RG       181.92
DM       20.800 usec
DE       8.18 usec
TE       300.2 K
D1       2.0000000 sec
D11      0.0300000 sec
TD0      1

===== CHANNEL F1 =====
SF01    100.6228303 MHz
NUC1     13C
P1       5.00 usec
PLM1    77.00000000 W

===== CHANNEL F2 =====
SF02    400.1316005 MHz
NUC2     1H
PCPDPRG12  waltz16
PCPD2     90.00 usec
PLM2     24.0000000 W
PLM12    0.1750000 W
PLM13    0.1422599 W

F2 - Processing parameters
SI       65536
SF       100.6126728 MHz
WDW      RM
SSB      0
LB       0
GB       0
PC       1.40
    
```

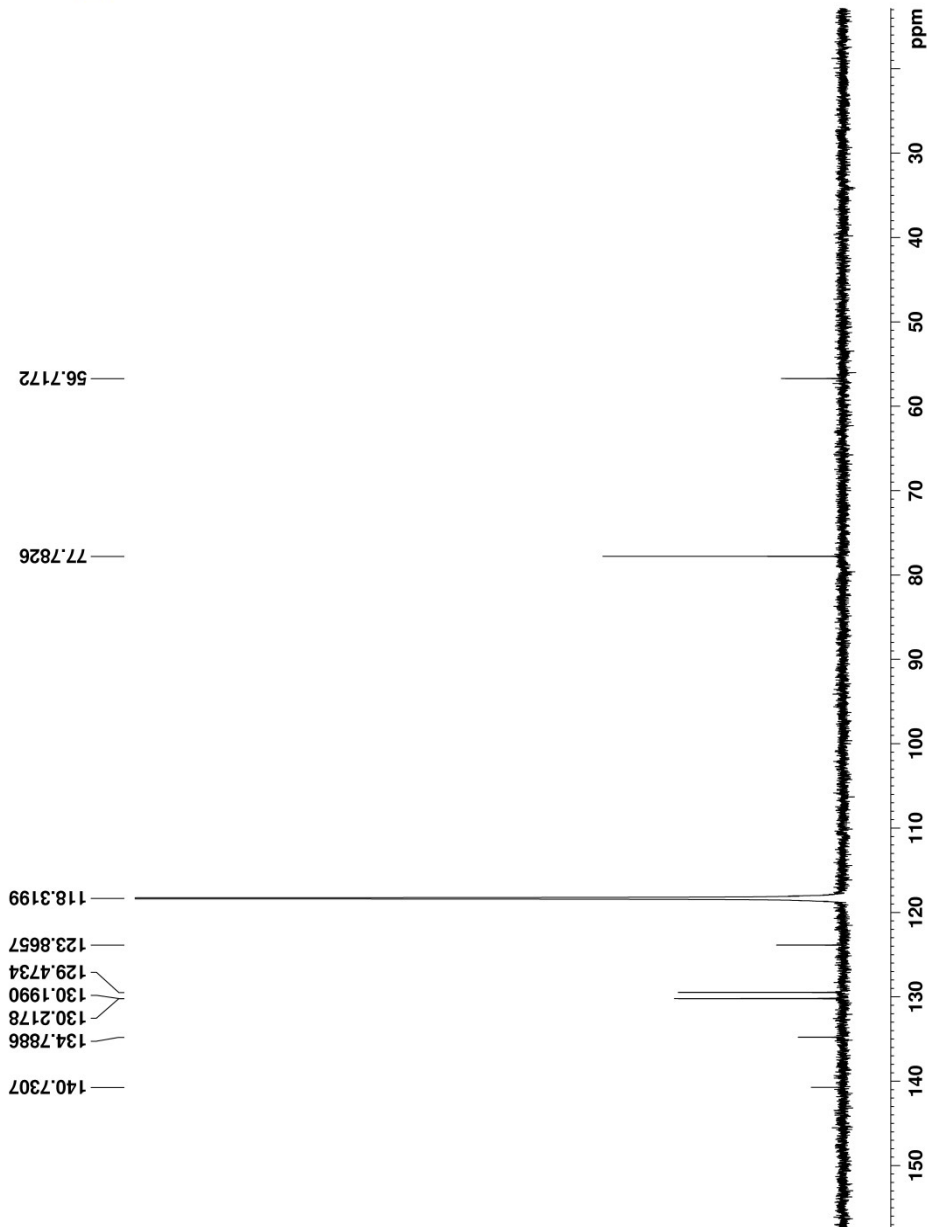

**Figure S7:** <sup>13</sup>C NMR (101 MHz, d<sub>3</sub>-MeCN) of [Os(η<sup>6</sup>-C<sub>6</sub>H<sub>6</sub>)(btz)Cl][PF<sub>6</sub>]



Current Data Parameters  
 NAME: DCO51a  
 EXPNO: 24  
 PROCNO: 1  
 F2 - Acquisition Parameters  
 Date\_: 20150519  
 Time: 3.43  
 INSTRUM: spect  
 PULPROG: zgpg30  
 FULPRAG: 65536  
 ID: 1  
 SOLVENT: CD3CN  
 NS: 12  
 DS: 2  
 SWH: 8223.685 Hz  
 FIDRES: 0.125483 Hz  
 AQ: 0.29588 sec  
 RG: 64.888 sec  
 DW: 60.800 usec  
 DE: 10.69 usec  
 DI: 3.000000 K  
 D1: 2.0000000 sec  
 TD0: 1  
 ===== CHANNEL f1 =====  
 SFO1: 400.1524710 MHz  
 NUC1: 1H  
 P1: 8.00 usec  
 PL1: 24.00000000 W  
 FLM1:  
 F2 - Processing parameters  
 SI: 32768  
 SF: 400.1300115 MHz  
 Mode: EM  
 SSB: 0  
 LB: 0.30 Hz  
 GB: 0  
 PC: 1.50

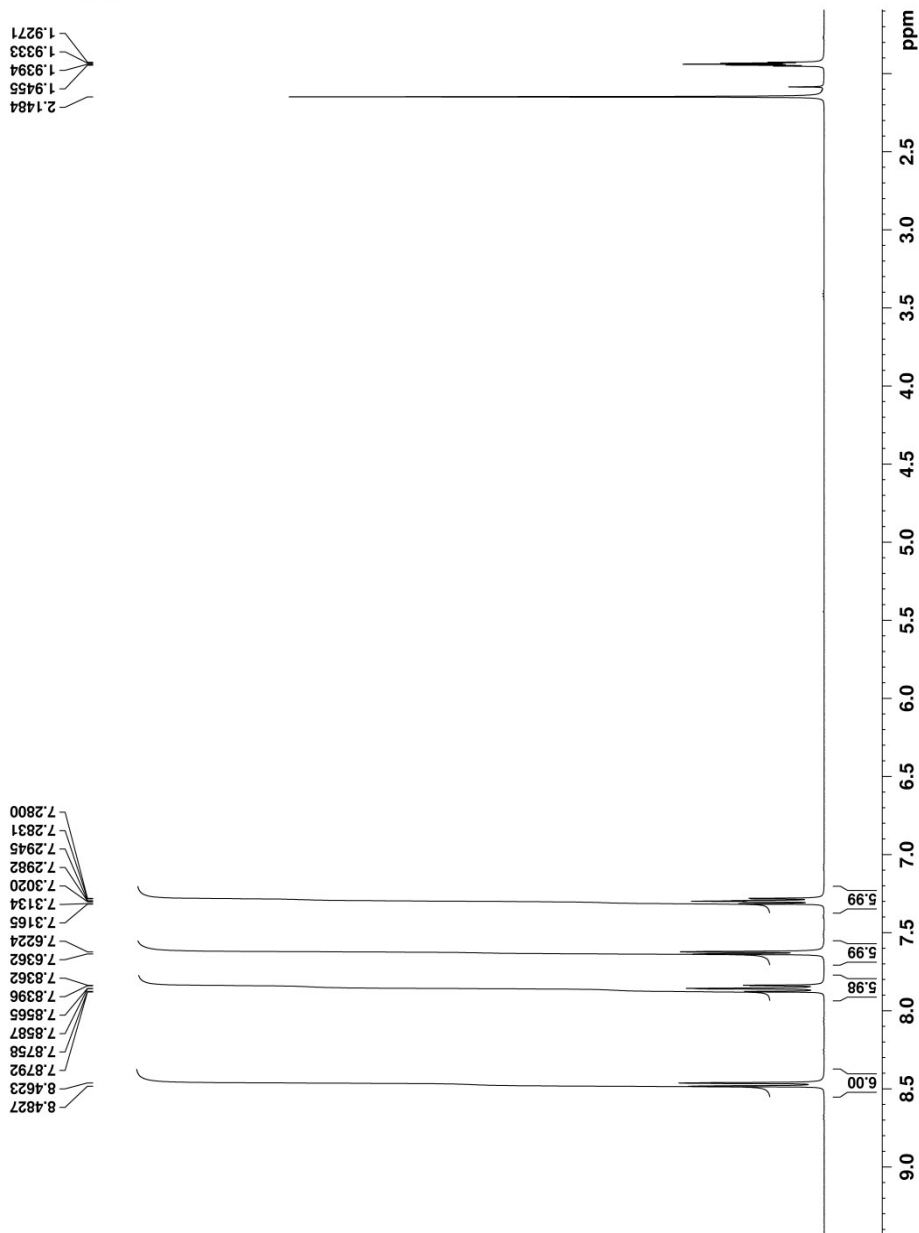

Figure S8: <sup>1</sup>H NMR (400 MHz, d<sub>3</sub>-MeCN) of [Os(bpy)<sub>3</sub>][PF<sub>6</sub>]<sub>2</sub> (Complex 1)

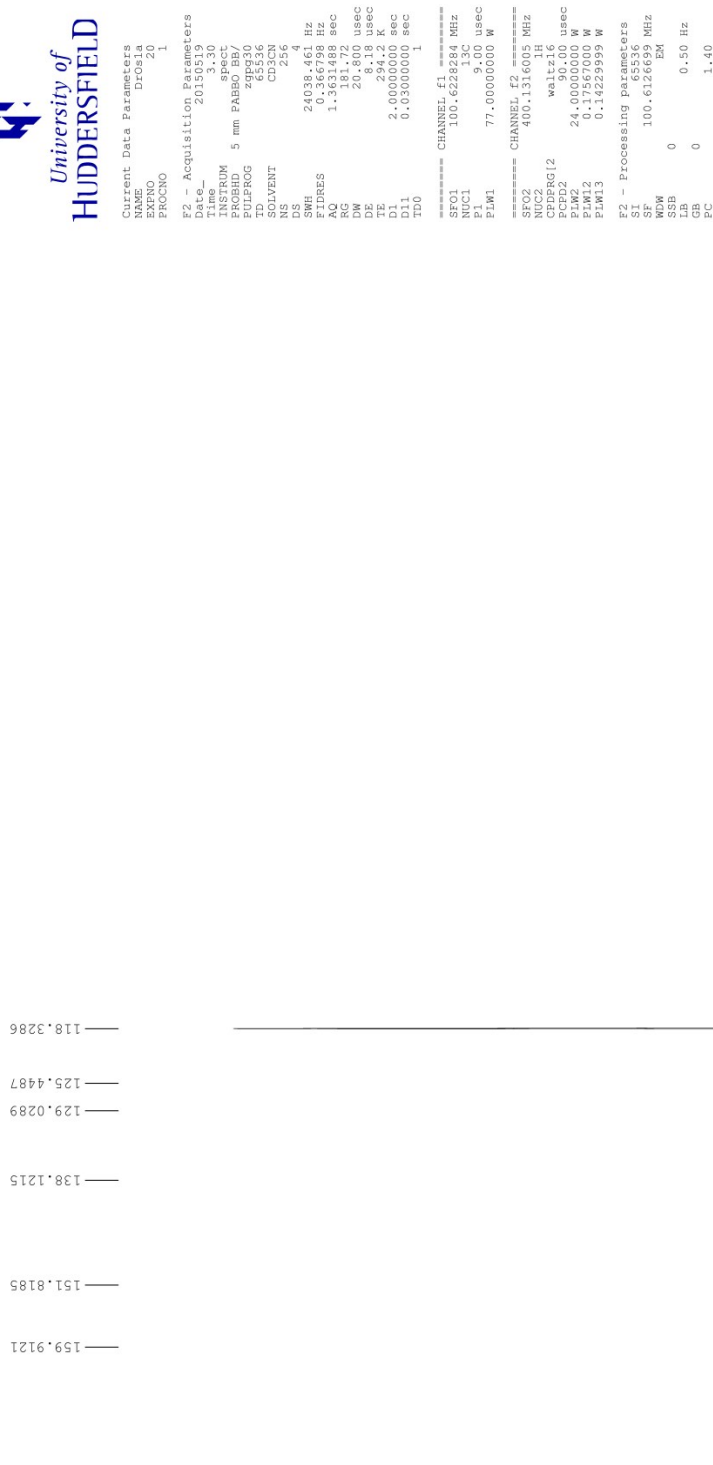

**Figure S9:**  $^{13}\text{C}$  NMR (101 MHz,  $d_3$ -MeCN) of  $[\text{Os}(\text{bpy})_3][\text{PF}_6]_2$  (Complex 1)

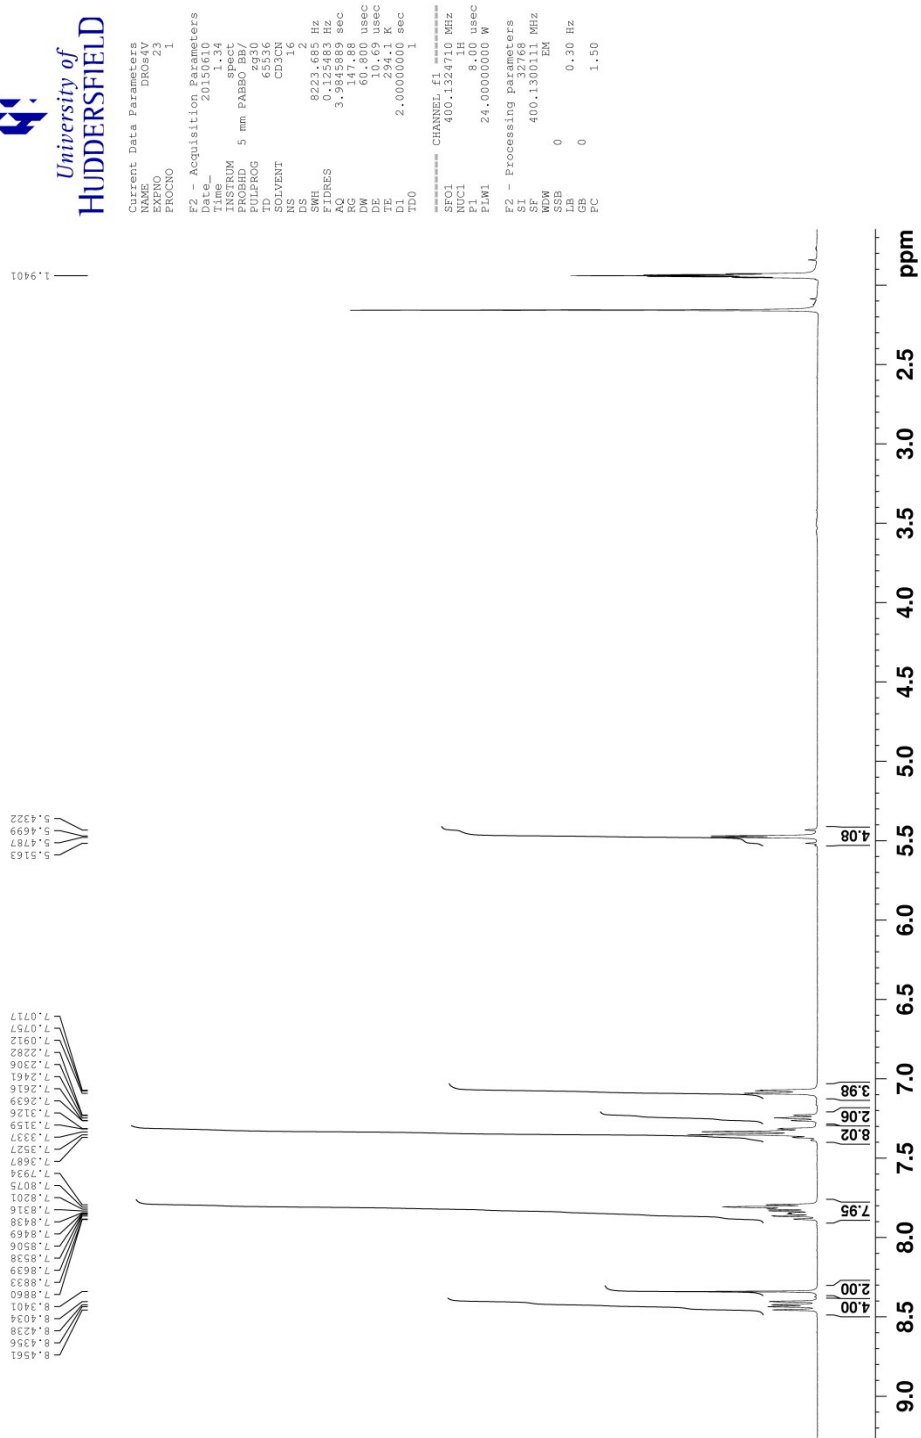

**Figure S10:**  $^1\text{H}$  NMR (400 MHz,  $\text{d}_3\text{-MeCN}$ ) of  $[\text{Os}(\text{bpy})_2(\text{btz})][\text{PF}_6]_2$  (Complex 2)

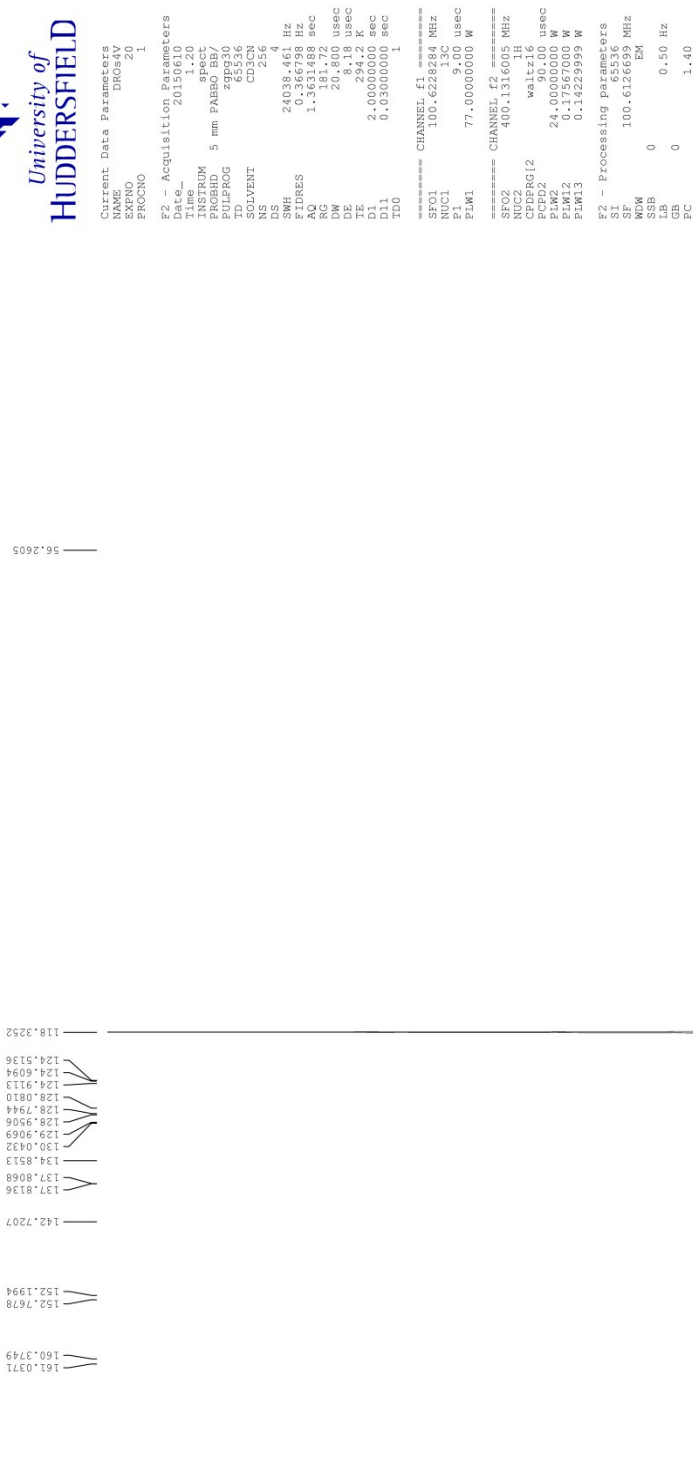

**Figure S11:**  $^{13}\text{C}$  NMR (101 MHz,  $d_3$ -MeCN) of  $[\text{Os}(\text{bpy})_2(\text{btz})][\text{PF}_6]_2$  (Complex 2)

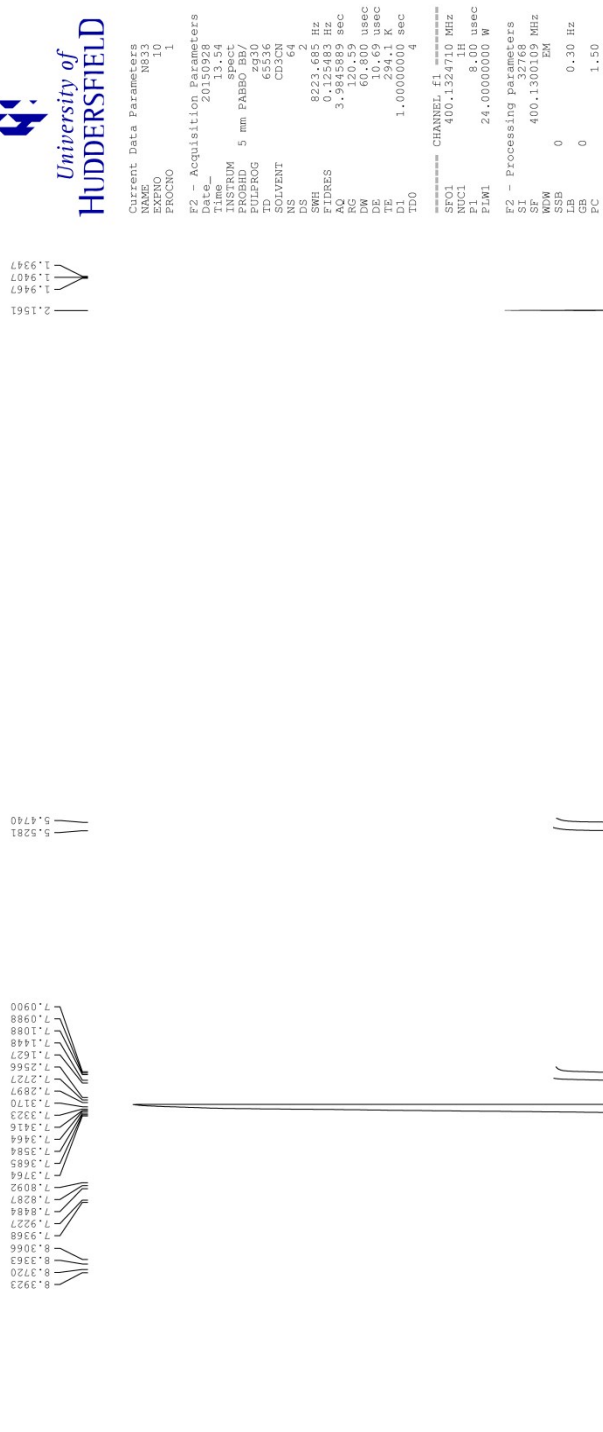

**Figure S12:**  $^1\text{H}$  NMR (400 MHz,  $d_3$ -MeCN) of  $[\text{Os}(\text{bpy})(\text{btz})_2][\text{PF}_6]_2$  (Complex 3)

```

Current Data Parameters
EXPNO 1
PROCNO 1
F2 - Acquisition Parameters
Date_ 20150928
Time 22.39
INSTRUM spect
PROBHD 5 mm PABBO-1
PULPROG zgpg30
TD 65536
SOLVENT CD3CN
DS 5
NS 514
SWH 24038.461 Hz
FIDRES 0.366788 Hz
AQ 1.353149 sec
RG 327.5
DW 20.800 usec
DE 8.18 usec
TE 294.4 K
D1 0.0300000 sec
D11 0.0300000 sec
DPO 1
===== CHANNEL f1 =====
SFO1 100.6228284 MHz
NUC1 13C
P1 9.00 usec
PWL1 77.00000000 W
===== CHANNEL f2 =====
SFO2 400.1316005 MHz
NUC2 1H
P2 12.00 usec
PWL2 1.00000000 W
===== CHANNEL f3 =====
SFO3 400.1316005 MHz
NUC3 1H
P3 12.00 usec
PWL3 1.00000000 W
F2 - Processing parameters
SI 65536
SF 100.6126624 MHz
WDW EM
SSB 0
LB 0.50 Hz
GB 0
FC 1.40
    
```

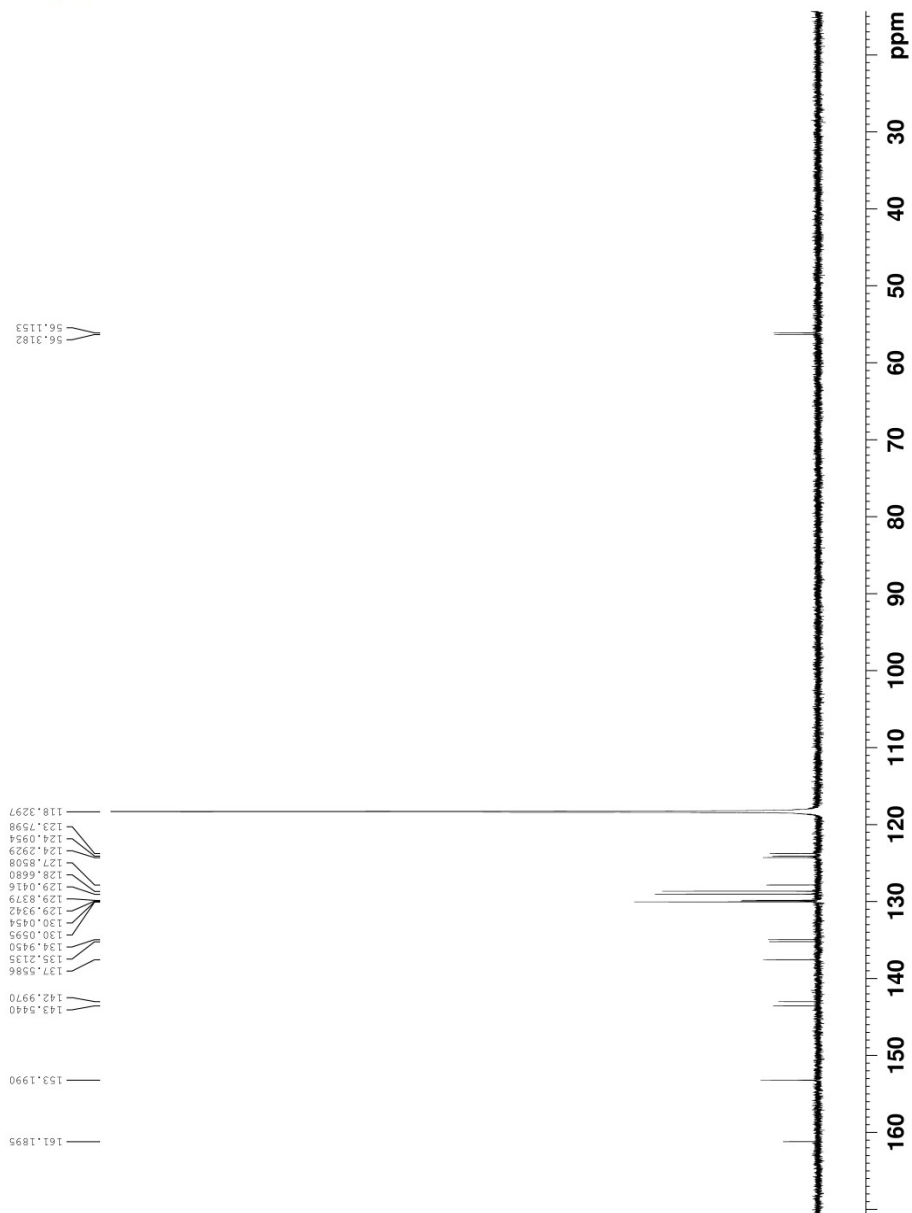

**Figure S13:** <sup>13</sup>C NMR (101 MHz, d<sub>3</sub>-MeCN) of [Os(bpy)(btz)<sub>2</sub>][PF<sub>6</sub>]<sub>2</sub> (Complex 3)

Current Data Parameters  
 NAME 0860  
 EXPNO 10  
 PROCNO 1  
  
 F2 - Acquisition Parameters  
 Date\_ 20151123  
 Time 16.25  
 INSTRUM spect  
 PULPROG zgpg30  
 TD 65536  
 SOLVENT CD3CN  
 DS 4  
 SMH 8223.685 Hz  
 FIDRES 0.125483 Hz  
 AQ 3.29833 sec  
 RG 1024.33  
 DW 60.800 usec  
 DE 10.69 usec  
 TE 298.15 K  
 D1 1.00000000 sec  
 TP0 4  
  
 ===== CHANNEL f1 =====  
 ST01 400.1324710 MHz  
 NUC1 1H  
 P1 8.00 usec  
 PLW1 24.00000000 W  
  
 F2 - Processing parameters  
 SI 32768  
 SF 400.1300112 MHz  
 SSF 0  
 SSB 0  
 LB 0.30 Hz  
 GB 0  
 FC 1.50

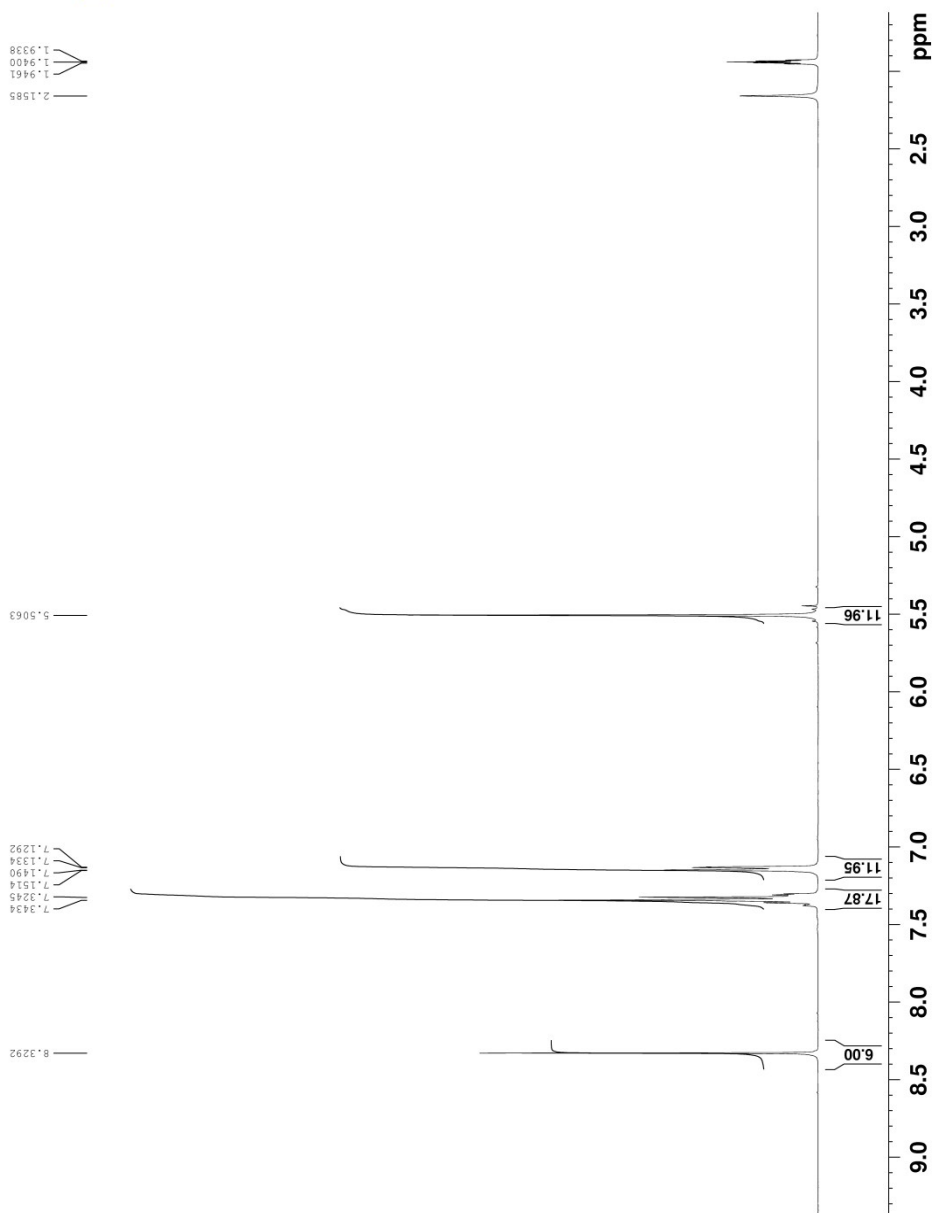

**Figure S14:** <sup>1</sup>H NMR (400 MHz, d<sub>3</sub>-MeCN) of [Os(btz)<sub>3</sub>][PF<sub>6</sub>]<sub>2</sub> (Complex 4)

```

Current Data Parameters
NAME      4861
EXPNO    10
PROCNO   1

F2 - Acquisition Parameters
Date_    20151123
Time     17.08
INSTRUM  spect
PROBHD   5 mm PABBO-7
PULPROG  zgpg30
TD        65536
SOLVENT  CD3CN
DS        2
SI        4
SWH       24038.461 Hz
FIDRES    0.3667798 Hz
AQ         1.3814929 sec
RG         381.72
DE         20.800 usec
DELTA     8.18 usec
TE        300.2 K
D1         2.00000000 sec
D11        0.03000000 sec
TD0        1

===== CHANNEL F1 =====
SFO1      100.6228303 MHz
NUC1      13C
P1         9.00 usec
PL1       77.00000000 W

===== CHANNEL F2 =====
SFO2      400.1316005 MHz
NUC2      13C
P2         9.00 usec
PL2       77.00000000 W
=====
PCPD2     waltz16
PCPD1     waltz16
PCPD2/2   90.00 usec
PLW2      24.00000000 W
PLW1      0.17250000 W
PLW1/2    0.14229999 W

F2 - Processing parameters
SI         65536
SF         100.6228303 MHz
WDW        EM
SSB        0
LB         1.00 Hz
GB         0
PC         1.40
    
```

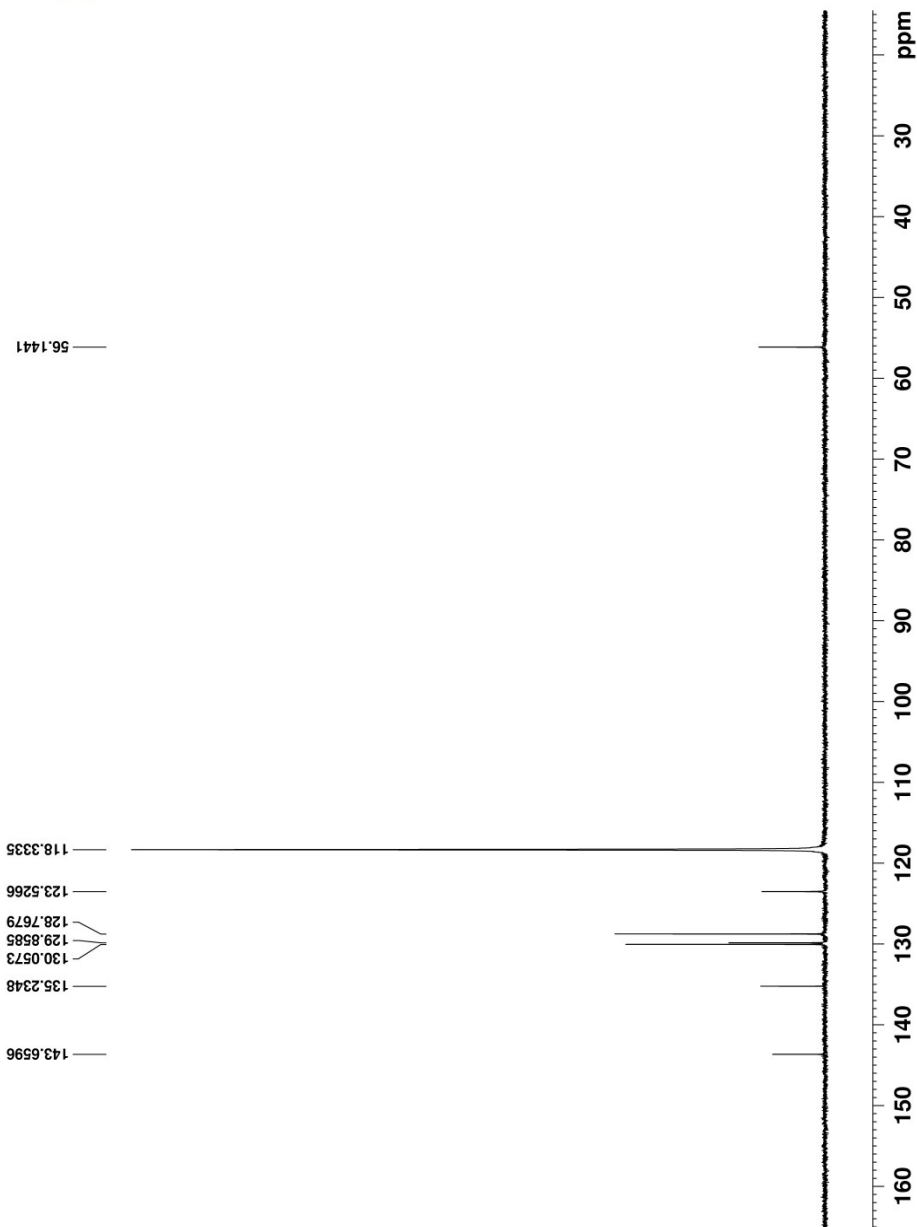

**Figure S15:** <sup>13</sup>C NMR (101 MHz, *d*<sub>3</sub>-MeCN) of [Os(btz)<sub>3</sub>][PF<sub>6</sub>]<sub>2</sub> (Complex 4)



## Optimised ground state geometry of the dication [Os(bpy)]<sup>2+</sup> (Complex 1)

61

geometry

|    |             |             |             |
|----|-------------|-------------|-------------|
| C  | -0.43206863 | 4.12929253  | -1.19301751 |
| C  | 0.39846474  | 4.31586787  | -2.28954884 |
| C  | 1.13802543  | 3.23367231  | -2.75940923 |
| C  | 1.01952871  | 2.01232390  | -2.11580824 |
| N  | 0.21440503  | 1.81875589  | -1.05005516 |
| C  | -0.51351054 | 2.87583239  | -0.58371466 |
| C  | -1.36652433 | 2.58306558  | 0.57910558  |
| N  | -1.28889403 | 1.30285576  | 1.04792002  |
| C  | -2.04307580 | 0.96127670  | 2.11378176  |
| C  | -2.88935204 | 1.85147883  | 2.75512098  |
| C  | -2.97325861 | 3.15864878  | 2.28275443  |
| C  | -2.20337631 | 3.52132615  | 1.18606714  |
| N  | 1.46711677  | -1.09965440 | -1.04752256 |
| C  | 1.23006240  | -1.89895263 | -2.10886326 |
| C  | 2.22725792  | -2.61537609 | -2.75096911 |
| C  | 3.53519795  | -2.51361978 | -2.28427156 |
| C  | 3.79108031  | -1.69563042 | -1.19230148 |
| C  | 2.74747889  | -0.99540947 | -0.58432331 |
| C  | 2.92275479  | -0.10452308 | 0.57373347  |
| C  | 4.15494806  | 0.15415822  | 1.17691453  |
| C  | 4.22795838  | 1.00763960  | 2.26925985  |
| C  | 3.05487512  | 1.59076836  | 2.74117456  |
| C  | 1.85951916  | 1.29972998  | 2.10369412  |
| N  | 1.77615885  | 0.47059290  | 1.04204397  |
| Os | 0.00081754  | -0.00009026 | 0.00066698  |
| N  | -1.68680001 | -0.72542405 | -1.04034037 |
| C  | -2.23573366 | -1.88399261 | -0.57008407 |
| C  | -1.54925463 | -2.47549682 | 0.58938268  |
| C  | -1.93981396 | -3.66906946 | 1.19921464  |
| C  | -1.23471449 | -4.15363314 | 2.29237920  |
| C  | -0.14226264 | -3.42683315 | 2.75839475  |
| C  | 0.20178726  | -2.24916826 | 2.11443705  |
| N  | -0.47696970 | -1.76767498 | 1.05190758  |
| C  | -2.26286252 | -0.12576737 | -2.10339230 |
| C  | -3.38342239 | -0.63423872 | -2.74038038 |
| C  | -3.94831665 | -1.81539765 | -2.26644702 |
| C  | -3.36539815 | -2.44057830 | -1.17267718 |
| H  | -1.01218711 | 4.96000267  | -0.81382707 |
| H  | 0.46707350  | 5.28637970  | -2.76666009 |
| H  | 1.80031887  | 3.32818204  | -3.61124894 |
| H  | 1.57593716  | 1.14758791  | -2.45142402 |
| H  | -1.94880680 | -0.06201884 | 2.45138710  |
| H  | -3.46983669 | 1.51946926  | 3.60717897  |
| H  | -3.62557346 | 3.88170343  | 2.75805888  |
| H  | -2.25800568 | 4.53234241  | 0.80492871  |
| H  | 0.20229587  | -1.95011071 | -2.44214287 |
| H  | 1.97625944  | -3.24040528 | -3.59922295 |
| H  | 4.34043424  | -3.06061462 | -2.76032430 |
| H  | 4.80132763  | -1.60666059 | -0.81561815 |
| H  | 5.05708604  | -0.30585467 | 0.79620551  |
| H  | 5.18125000  | 1.21345156  | 2.74160722  |
| H  | 3.05926766  | 2.26365559  | 3.58993826  |
| H  | 0.92682174  | 1.73126917  | 2.44110398  |
| H  | -2.78998954 | -4.22231995 | 0.82302426  |

|   |             |             |             |
|---|-------------|-------------|-------------|
| H | -1.53192743 | -5.07986814 | 2.76986117  |
| H | 0.44018776  | -3.76287523 | 3.60752478  |
| H | 1.04250565  | -1.65543910 | 2.44711529  |
| H | -1.79397641 | 0.78814541  | -2.44235632 |
| H | -3.80110989 | -0.10856122 | -3.59031890 |
| H | -4.82579768 | -2.24152670 | -2.73833367 |
| H | -3.79270369 | -3.35800133 | -0.79038426 |

### Optimised ground state geometry of the dication [Os(bpy)<sub>2</sub>(btz)]<sup>2+</sup> (Complex 2)

61

geometry

|    |             |             |             |
|----|-------------|-------------|-------------|
| C  | 3.42150948  | -3.04135894 | -1.86041416 |
| C  | 2.76498902  | -3.29962717 | -0.66504864 |
| C  | 1.83042104  | -2.38854153 | -0.17188577 |
| N  | 1.54340025  | -1.23957671 | -0.84909976 |
| C  | 2.18752794  | -0.99790963 | -2.00783430 |
| C  | 3.12604814  | -1.86532984 | -2.54331888 |
| C  | 1.25774844  | -3.67072572 | 1.93411630  |
| C  | 0.53407553  | -3.75134288 | 3.11574567  |
| C  | -0.34567216 | -2.71947612 | 3.43328803  |
| C  | -0.47084086 | -1.65457176 | 2.55590453  |
| N  | 0.22432267  | -1.56858753 | 1.40269175  |
| C  | 1.09358547  | -2.57250385 | 1.08791401  |
| C  | 0.46847162  | 3.75831096  | -3.11628899 |
| C  | 1.19528491  | 3.68915894  | -1.93586379 |
| C  | 1.05038428  | 2.58819019  | -1.08970650 |
| N  | 0.19701987  | 1.57037100  | -1.40334013 |
| C  | -0.50116811 | 1.64525519  | -2.55553500 |
| C  | -0.39475959 | 2.71228043  | -3.43279891 |
| C  | 2.71281352  | 3.34186381  | 0.66058852  |
| C  | 3.37549848  | 3.09402278  | 1.85476678  |
| C  | 3.10032696  | 1.91322426  | 2.53790123  |
| C  | 2.17506893  | 1.03081606  | 2.00382902  |
| N  | 1.52505996  | 1.26226007  | 0.84628788  |
| C  | 1.79225286  | 2.41587236  | 0.16882855  |
| N  | -1.67680336 | -2.00556807 | -1.67666873 |
| N  | -2.98337696 | -2.23468837 | -1.84322467 |
| C  | -3.74160681 | -1.38134655 | -1.11314393 |
| C  | -2.83558189 | -0.57588855 | -0.46103398 |
| N  | -1.58168480 | -1.00041188 | -0.84352945 |
| N  | -1.70612674 | 1.98494323  | 1.67016271  |
| N  | -3.01571955 | 2.20552381  | 1.82397163  |
| C  | -3.76142566 | 1.33565173  | 1.10032350  |
| C  | -2.84382600 | 0.53315215  | 0.46106080  |
| N  | -1.59627055 | 0.97425611  | 0.84569277  |
| C  | -3.42808868 | -3.34369345 | -2.69158814 |
| C  | -3.47847299 | 3.26553079  | 2.72391702  |
| Os | 0.07374002  | -0.00022847 | -0.00023120 |
| H  | 4.14922299  | -3.74372385 | -2.24944607 |
| H  | 2.98285247  | -4.20844122 | -0.12013184 |
| H  | 1.92761930  | -0.07694023 | -2.51122866 |
| H  | 3.61185493  | -1.61691728 | -3.47891935 |
| H  | 1.94981437  | -4.46086494 | 1.67520729  |
| H  | 0.65761496  | -4.60073012 | 3.77727306  |
| H  | -0.92769993 | -2.73343013 | 4.34667041  |
| H  | -1.13665984 | -0.82835154 | 2.76670163  |
| H  | 0.57703243  | 4.60981804  | -3.77771265 |
| H  | 1.87481736  | 4.49039044  | -1.67784359 |

|   |             |             |             |
|---|-------------|-------------|-------------|
| H | -1.15364738 | 0.80830081  | -2.76574741 |
| H | -0.97838177 | 2.71694550  | -4.34525155 |
| H | 2.91501169  | 4.25417181  | 0.11546763  |
| H | 4.09242782  | 3.80799655  | 2.24268932  |
| H | 3.59169797  | 1.67253158  | 3.47260913  |
| H | 1.93103567  | 0.10565447  | 2.50747822  |
| H | -4.81878433 | -1.41651470 | -1.11560236 |
| H | -4.83893556 | 1.36003411  | 1.09679985  |
| H | -4.31107037 | -3.03762833 | -3.24989440 |
| H | -3.65857507 | -4.21392194 | -2.07675641 |
| H | -2.62148618 | -3.58176352 | -3.38003719 |
| H | -4.26008358 | 3.84271228  | 2.23232189  |
| H | -2.62902278 | 3.90720757  | 2.94206779  |
| H | -3.86029769 | 2.83095286  | 3.64781736  |

### Optimised ground state geometry of the dication [Os(bpy)(btz)<sub>2</sub>]<sup>2+</sup> (Complex 3)

61

geometry

|    |             |             |             |
|----|-------------|-------------|-------------|
| C  | -0.44174366 | 3.99580670  | 2.86488723  |
| C  | -0.23383429 | 4.09262186  | 1.49596826  |
| C  | -0.13464499 | 2.93537900  | 0.72308171  |
| N  | -0.23996533 | 1.70091633  | 1.29217686  |
| C  | -0.43246925 | 1.61674744  | 2.62264334  |
| C  | -0.54036862 | 2.73145696  | 3.43841338  |
| C  | 0.18271455  | 4.09047386  | -1.50569006 |
| C  | 0.39192466  | 3.99193529  | -2.87428893 |
| C  | 0.50672868  | 2.72711620  | -3.44375730 |
| C  | 0.41301727  | 1.61374016  | -2.62442117 |
| N  | 0.21935971  | 1.69970655  | -1.29423825 |
| C  | 0.09826555  | 2.93454025  | -0.72910003 |
| N  | -0.08850271 | -2.19420263 | -2.19845925 |
| N  | 0.80449468  | -3.00917761 | -2.77002606 |
| C  | 2.05391619  | -2.80642158 | -2.28515368 |
| C  | 1.91261928  | -1.79867216 | -1.35889426 |
| N  | 0.57783868  | -1.45677093 | -1.34651284 |
| N  | 2.89941702  | 0.54288061  | 1.06989935  |
| N  | 4.10594542  | 0.01063572  | 0.85298228  |
| C  | 4.06434793  | -0.96786573 | -0.08341030 |
| C  | 2.74235898  | -1.03772130 | -0.45830581 |
| N  | 2.07172189  | -0.09099762 | 0.28227321  |
| C  | 0.36486666  | -3.99952163 | -3.75499496 |
| C  | 5.27463041  | 0.54496817  | 1.55483253  |
| N  | 0.11734309  | -2.18592945 | 2.20881568  |
| N  | -0.76521766 | -3.01048750 | 2.78285933  |
| C  | -2.01710180 | -2.82514252 | 2.29734769  |
| C  | -1.88859145 | -1.81855859 | 1.36797617  |
| N  | -0.55827577 | -1.45971121 | 1.35456066  |
| N  | -2.90495941 | 0.50235872  | -1.06841159 |
| N  | -4.10460570 | -0.04460402 | -0.84990264 |
| C  | -4.05060581 | -1.01946009 | 0.08964983  |
| C  | -2.72788219 | -1.07116334 | 0.46489878  |
| N  | -2.06932746 | -0.11832366 | -0.27866072 |
| C  | -0.31329998 | -3.99149233 | 3.77161977  |
| C  | -5.27993921 | 0.47250822  | -1.55355181 |
| Os | 0.00011756  | 0.06370424  | 0.00157611  |
| H  | -0.51960571 | 4.89006911  | 3.47201095  |
| H  | -0.14431530 | 5.06705018  | 1.03459881  |
| H  | -0.48806764 | 0.61591955  | 3.02848739  |

|   |             |             |             |
|---|-------------|-------------|-------------|
| H | -0.69448650 | 2.60365915  | 4.50283279  |
| H | 0.08074012  | 5.06515463  | -1.04744763 |
| H | 0.45839915  | 4.88516962  | -3.48427385 |
| H | 0.66254331  | 2.59788571  | -4.50775695 |
| H | 0.48141753  | 0.61240885  | -3.02705582 |
| H | 2.90603185  | -3.37187722 | -2.62504290 |
| H | 4.94185840  | -1.51142680 | -0.39274668 |
| H | 1.08265959  | -4.03933488 | -4.57268893 |
| H | -0.60459037 | -3.68525901 | -4.13260998 |
| H | 0.27926081  | -4.98047100 | -3.28697072 |
| H | 5.77228030  | 1.29284513  | 0.93701809  |
| H | 5.96108367  | -0.26964032 | 1.77851075  |
| H | 4.93084926  | 1.00016917  | 2.48002813  |
| H | -2.86196214 | -3.40035758 | 2.63897739  |
| H | -4.92112087 | -1.57322299 | 0.40064720  |
| H | -1.02533511 | -4.03020314 | 4.59442195  |
| H | 0.65668778  | -3.66867866 | 4.14052308  |
| H | -0.22471200 | -4.97501818 | 3.30961580  |
| H | -5.95712055 | -0.35116788 | -1.77219865 |
| H | -4.94228302 | 0.92667730  | -2.48151248 |
| H | -5.78567277 | 1.21787874  | -0.93928179 |

### Optimised ground state geometry of the dication [Os(btz)<sub>3</sub>]<sup>2+</sup> (Complex 4)

61

geometry

|   |             |             |             |
|---|-------------|-------------|-------------|
| N | 2.34852699  | 0.06761760  | 2.06707449  |
| N | 3.42931777  | 0.82791492  | 2.26737225  |
| C | 3.54944825  | 1.79254126  | 1.32243967  |
| C | 2.46702808  | 1.60792597  | 0.49434203  |
| N | 1.76142441  | 0.53957297  | 0.99993444  |
| N | 0.27632095  | 2.23126785  | -2.18300546 |
| N | 1.16203112  | 3.19122185  | -2.46635645 |
| C | 2.17814629  | 3.22052897  | -1.56942455 |
| C | 1.89222419  | 2.20814389  | -0.68354164 |
| N | 0.71722275  | 1.63140040  | -1.10970179 |
| C | 4.33585678  | 0.52822604  | 3.37609896  |
| C | 0.93186579  | 4.08253026  | -3.60367914 |
| N | -1.11670469 | 2.02047728  | 2.11433111  |
| N | -2.30259040 | 2.57862670  | 2.37592725  |
| C | -3.24924149 | 2.19183301  | 1.48589330  |
| C | -2.59531136 | 1.33851452  | 0.62816378  |
| N | -1.29105504 | 1.26601121  | 1.06242001  |
| N | -2.19144732 | -0.90181040 | -2.05025703 |
| N | -3.48466322 | -0.63193605 | -2.25327909 |
| C | -3.96472766 | 0.24990790  | -1.34234878 |
| C | -2.89229125 | 0.53116018  | -0.52861179 |
| N | -1.82981019 | -0.20006502 | -1.00962671 |
| C | -2.43479636 | 3.52294566  | 3.48579288  |
| C | -4.18316879 | -1.22570463 | -3.39370972 |
| N | 1.75073163  | -1.46314098 | -2.14618058 |
| N | 2.13452178  | -2.72296050 | -2.37387418 |
| C | 1.66928963  | -3.57124804 | -1.42419326 |
| C | 0.95160450  | -2.77367592 | -0.56379610 |
| N | 1.03101024  | -1.49077309 | -1.05651456 |
| N | -1.08536821 | -1.96187175 | 2.18353327  |
| N | -0.97900909 | -3.26994628 | 2.43666285  |
| C | -0.21266652 | -3.90141544 | 1.51369865  |

|    |             |             |             |
|----|-------------|-------------|-------------|
| C  | 0.16836963  | -2.91125669 | 0.63859965  |
| N  | -0.39256129 | -1.74127399 | 1.09840350  |
| C  | 2.99906437  | -3.02668671 | -3.51463620 |
| C  | -1.60423702 | -3.83422913 | 3.63320536  |
| Os | -0.00065172 | 0.00078198  | -0.00251381 |
| H  | 4.35983195  | 2.50264576  | 1.31903579  |
| H  | 2.98824678  | 3.92798283  | -1.63446119 |
| H  | 4.70706198  | 1.46045055  | 3.79831593  |
| H  | 5.17050062  | -0.07945635 | 3.02534459  |
| H  | 3.77336663  | -0.01672069 | 4.12975098  |
| H  | 1.88353129  | 4.30686203  | -4.08233979 |
| H  | 0.45782912  | 5.00533323  | -3.26802810 |
| H  | 0.28136701  | 3.56735707  | -4.30567518 |
| H  | -4.26797303 | 2.53924182  | 1.53585628  |
| H  | -4.98705836 | 0.59023252  | -1.34827631 |
| H  | -2.36503437 | 4.54709348  | 3.11812990  |
| H  | -1.62878311 | 3.32703398  | 4.18811289  |
| H  | -3.39435512 | 3.36908169  | 3.97648242  |
| H  | -5.19393794 | -1.49885919 | -3.09519943 |
| H  | -3.63556697 | -2.11523292 | -3.69391859 |
| H  | -4.21760590 | -0.51730937 | -4.22176163 |
| H  | 1.87656607  | -4.62850630 | -1.43986551 |
| H  | -0.01022619 | -4.95895298 | 1.55425620  |
| H  | 2.69659960  | -3.97655215 | -3.95221580 |
| H  | 4.03982534  | -3.07959855 | -3.19379344 |
| H  | 2.87801297  | -2.23163927 | -4.24575677 |
| H  | -2.01725148 | -4.81337889 | 3.39650411  |
| H  | -2.40213682 | -3.16337755 | 3.94075347  |
| H  | -0.86890674 | -3.92331111 | 4.43323060  |

**Table S2.** Summary of TDDFT vertical excitation data for complexes **1** to **4**.

| Complex  | Transition      | Wavelength / nm<br>(Energy / eV, <i>f</i> ) | Composition                                                    | Character                  |
|----------|-----------------|---------------------------------------------|----------------------------------------------------------------|----------------------------|
| <b>1</b> | S <sub>1</sub>  | 543 (2.28, 0.0023)                          | HOMO→LUMO                                                      | <sup>1</sup> MLCT          |
|          | S <sub>4</sub>  | 482 (2.57, 0.022)                           | HOMO-1→LUMO                                                    | <sup>1</sup> MLCT          |
|          | S <sub>6</sub>  | 443 (2.80, 0.11)                            | HOMO-1→LUMO+1, HOMO-1→LUMO+2,<br>HOMO-2→LUMO+1 & HOMO-2→LUMO+2 | <sup>1</sup> MLCT          |
|          | S <sub>22</sub> | 329 (3.77, 0.10)                            | HOMO-1→LUMO+7, HOMO-1→LUMO+5 &<br>HOMO-2→LUMO+4                | <sup>1</sup> MLCT          |
|          | S <sub>38</sub> | 272 (4.56, 0.46)                            | HOMO-4→LUMO+1 & HOMO-3→LUMO+2                                  | <sup>1</sup> LC            |
| <b>2</b> | S <sub>1</sub>  | 518 (2.39, 0.0022)                          | HOMO→LUMO                                                      | <sup>1</sup> MLCT(bpy)     |
|          | S <sub>5</sub>  | 438 (2.83, 0.13)                            | HOMO-2→LUMO & HOMO-1→LUMO+1                                    | <sup>1</sup> MLCT(bpy)     |
|          | S <sub>6</sub>  | 417 (2.97, 0.047)                           | HOMO-2→LUMO+1                                                  | <sup>1</sup> MLCT(bpy)     |
|          | S <sub>18</sub> | 328 (3.78, 0.090)                           | HOMO→LUMO+7 & HOMO-1→LUMO+3                                    | <sup>1</sup> MLCT(bpy&btz) |
|          | S <sub>23</sub> | 314 (3.95, 0.092)                           | HOMO-2→LUMO+6 & HOMO-2→LUMO+8                                  | <sup>1</sup> MLCT(bpy&btz) |
|          | S <sub>35</sub> | 272 (4.55, 0.54)                            | HOMO-4→LUMO                                                    | <sup>1</sup> LC(bpy)       |
| <b>3</b> | S <sub>1</sub>  | 493 (2.51, 0.0014)                          | HOMO→LUMO                                                      | <sup>1</sup> MLCT(bpy)     |
|          | S <sub>3</sub>  | 419 (2.96, 0.10)                            | HOMO-2→LUMO                                                    | <sup>1</sup> MLCT(bpy)     |
|          | S <sub>17</sub> | 318 (3.90, 0.99)                            | HOMO-1→LUMO+3 & HOMO→LUMO+6                                    | <sup>1</sup> MLCT(bpy&btz) |
|          | S <sub>26</sub> | 299 (4.14, 0.14)                            | HOMO-2→LUMO+7 & HOMO-1→LUMO+8                                  | <sup>1</sup> MLCT(btz)     |
|          | S <sub>32</sub> | 273 (4.55, 0.32)                            | HOMO-3→LUMO & HOMO-5→LUMO                                      | <sup>1</sup> LC(bpy)       |
| <b>4</b> | S <sub>1</sub>  | 374 (3.31, 0.011)                           | HOMO→LUMO                                                      | <sup>1</sup> MLCT          |
|          | S <sub>5</sub>  | 344 (3.60, 0.018)                           | HOMO-1→LUMO                                                    | <sup>1</sup> MLCT          |
|          | S <sub>13</sub> | 312 (3.98, 0.084)                           | HOMO→LUMO+8, HOMO-1→LUMO+6 &<br>HOMO-1→LUMO+3                  | <sup>1</sup> MLCT          |
|          | S <sub>22</sub> | 300 (4.13, 0.13)                            | HOMO-1→LUMO+6                                                  | <sup>1</sup> MLCT          |
|          | S <sub>25</sub> | 295 (4.20, 0.091)                           | HOMO-1→LUMO+8, HOMO-2→LUMO+7 &<br>HOMO→LUMO+6                  | <sup>1</sup> MLCT          |

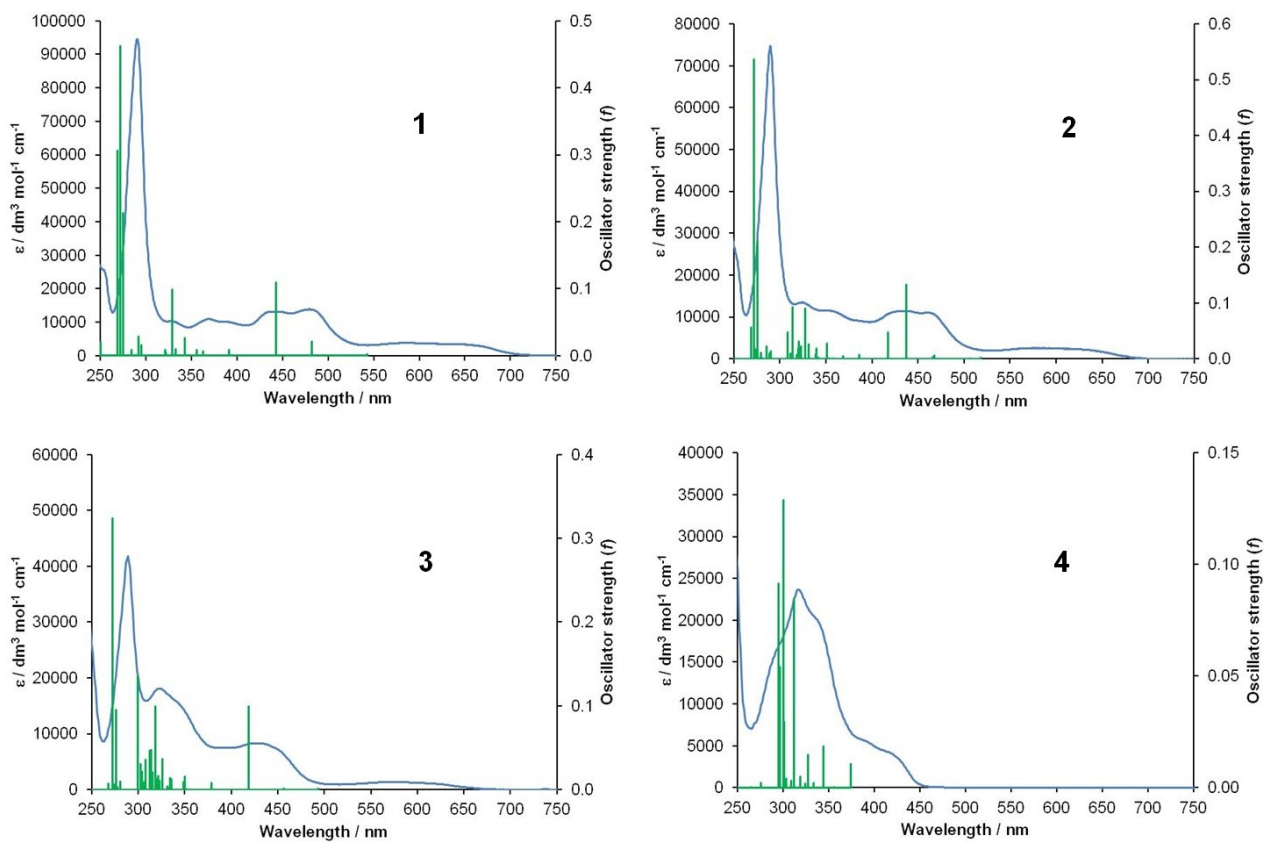

**Figure S16:** Calculated TDDFT optical absorption spectra for complexes **1** to **4** overlaid with experimental UV-Visible absorption data in acetonitrile solutions.
